# Supplementary material for: Evaluation of Funneliformis mosseae inoculation effects on growth, nutrient uptake, and essential oil content in Turkish oregano under drought stress
Source: PeerJ. 2025 Jun 19;13:e19499. doi: 10.7717/peerj.19499 (PMC12182728; doi:10.7717/peerj.19499)
Supplement: Supplemental Information 1 [file peerj-13-19499-s001.xlsx]

## Sheet: All Data
Irrigation rate	AMF treatment	Plant Fresh weight	Plant dry weight	Potassium	Calcium	Phosphate	Nitrogen	Magnesium	Sodium	Iron	Essential Oil content	Fungal Colonization (%)	Spore number (10g soil)
25	Yes	16.26	4.11	2.95	0.9	0.35	1.62	0.35	2900	503	3.44	15.5	100
25	Yes	15.52	4.45	3.1	1	0.37	1.61	0.38	3100	519	3.32	14.7	110
25	Yes	19.34	4.42	3.05	0.8	0.32	1.58	0.31	3200	488	3.34	13.3	115
50	Yes	19.88	5.43	3.4	1.2	0.39	1.75	0.34	2900	532	2.62	17.5	175
50	Yes	18.25	4.45	3.2	1.1	0.35	1.79	0.36	2800	530	2.67	18.2	170
50	Yes	21.3	6.1	3.5	1	0.38	1.81	0.37	2800	538	2.72	18.8	178
75	Yes	22	4.71	3.75	1.2	0.39	2.07	0.35	2300	703	2.55	26.5	240
75	Yes	17.72	4.38	3.8	1.15	0.41	2.02	0.37	2400	724	2.48	31.2	245
75	Yes	24.11	6.98	3.8	1.3	0.38	2.02	0.39	2900	735	2.44	34.4	246
100	Yes	22.27	5.32	4.1	1.4	0.41	2.51	0.36	2500	833	2.29	47.2	335
100	Yes	24.5	5.72	4	1.1	0.4	2.56	0.4	2400	854	2.27	48.5	330
100	Yes	22.13	5.33	4.3	1.3	0.45	2.57	0.44	2600	850	2.24	52.3	320
25	No	12.61	3.12	2.45	0.8	0.29	1.32	0.26	3200	353	3.2	0	0
25	No	14.67	3.74	2.55	0.9	0.33	1.32	0.3	3000	363	3.15	0	0
25	No	14.84	4.77	2.65	0.95	0.31	1.3	0.31	3100	372	3.18	0	0
50	No	15.41	4.06	3.45	1.01	0.37	1.7	0.34	3000	502	2.58	0	0
50	No	15.53	4	3.3	1.05	0.39	1.68	0.38	3100	519	2.68	0	0
50	No	15.99	4.04	3.1	1.04	0.35	1.63	0.34	2900	494	2.66	0	0
75	No	18.59	4.7	3.65	1.3	0.42	2.11	0.35	2500	702	2.5	0	0
75	No	21.09	4.92	3.55	1.2	0.35	1.61	0.39	2700	708	2.48	0	0
75	No	21.17	4.04	3.7	1.1	0.38	1.61	0.38	2700	689	2.44	0	0
100	No	21.47	4.82	3.92	1.3	0.37	2.3	0.38	2600	839	2.14	0	0
100	No	24.66	3.73	3.8	1	0.41	2.27	0.4	2500	846	2.12	0	0
100	No	19.46	5.26	3.78	1.4	0.39	2.26	0.41	2500	844	2.18	0	0
